# Supplementary material for: The Effects of Thinning on Tree Growth and Stand Biomass in a Chronosequence of Pinus tabulaeformis Plantations in the Loess Plateau of China
Source: MDPI journal article supplement (doi:10.3390/f14081620), 2023-08-11
Supplement: s1 [file s1]

Archive with 1 entries (1 files):
- forests-2418939-supplementary.pdf
