# Supplementary figures and images for: The Effects of Thinning on Tree Growth and Stand Biomass in a Chronosequence of Pinus tabulaeformis Plantations in the Loess Plateau of China
Source: MDPI journal article supplement (doi:10.3390/f14081620), 2023-08-11

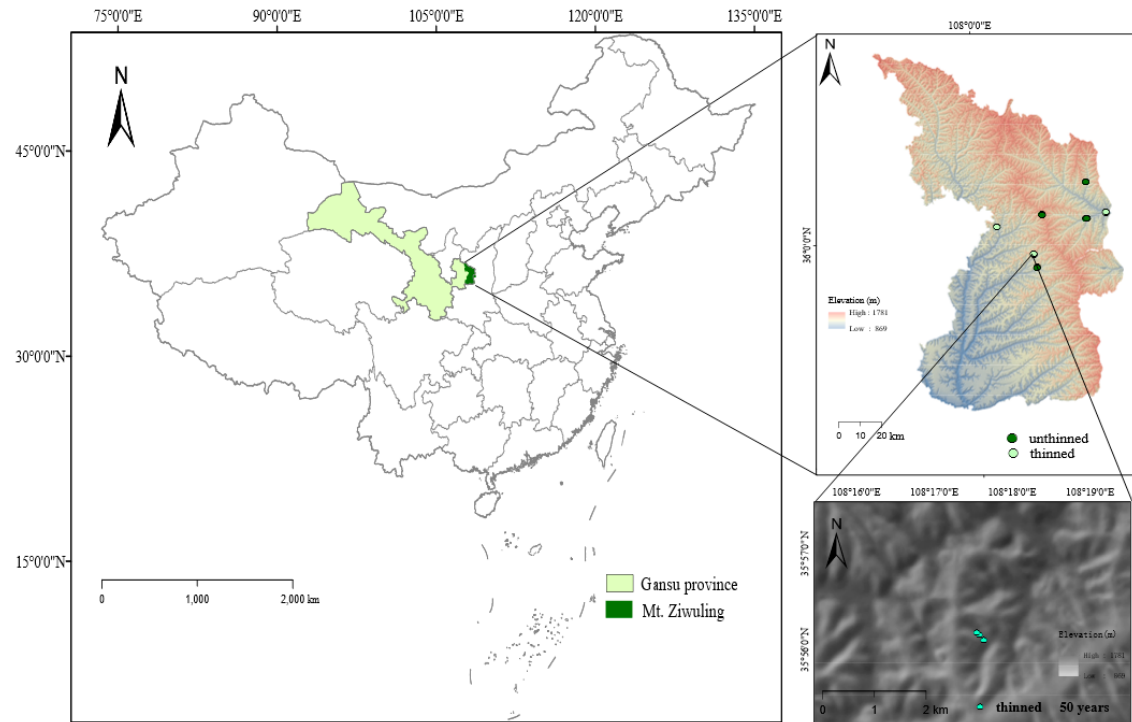

**Figure S1.** Map of the studied site, stands and plots.

Supplement: s1 [file s1 › forests-2418939-supplementary.pdf]
